# Supplementary material
Source: publisher site journal article supplement (https://www.spandidos-publications.com/741/downloadSupplementary)

Figure S1. Apoptosis analysis dot plots of one representative patient. Percentages of apoptosis of B (CD19+) and T (CD3+, CD4+) lymphocytes pre and post-surgery with CPB.

### Pre-surgery

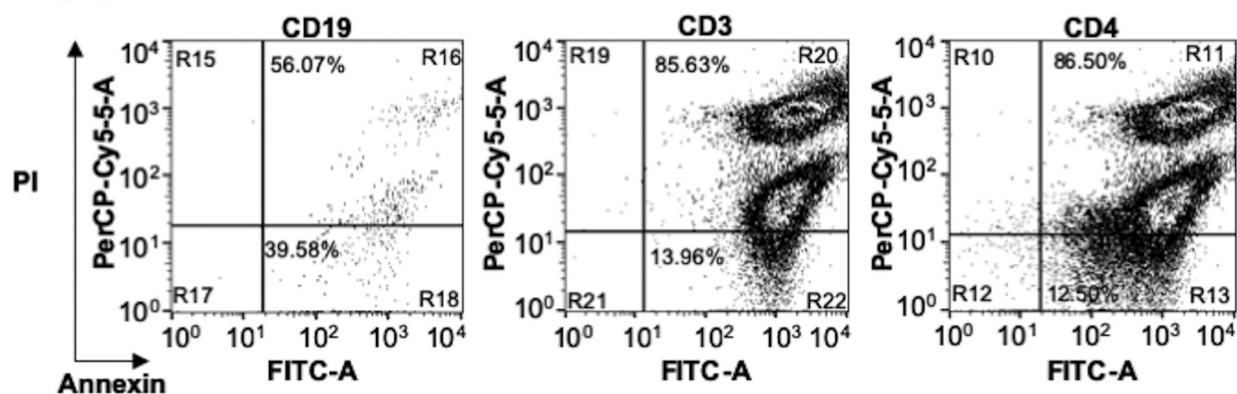

### Post-surgery

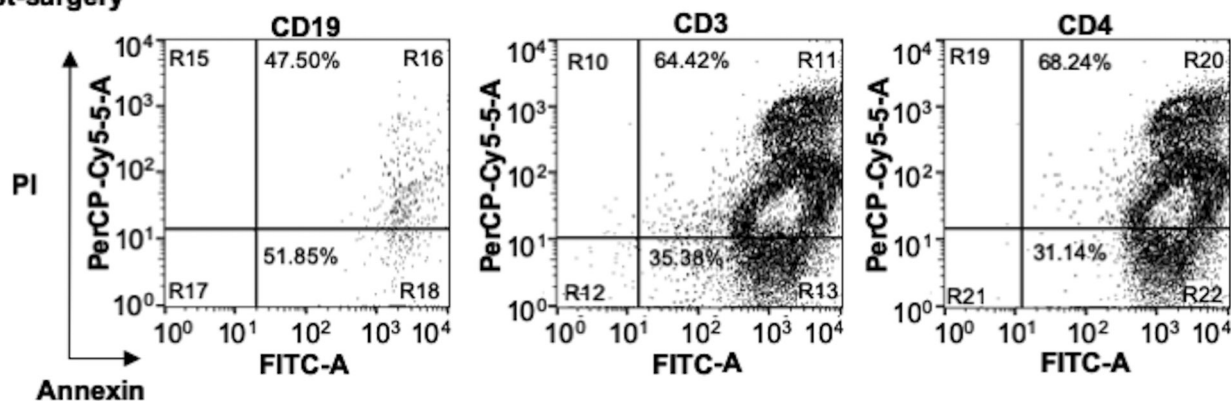

### Post-surgery 24 h

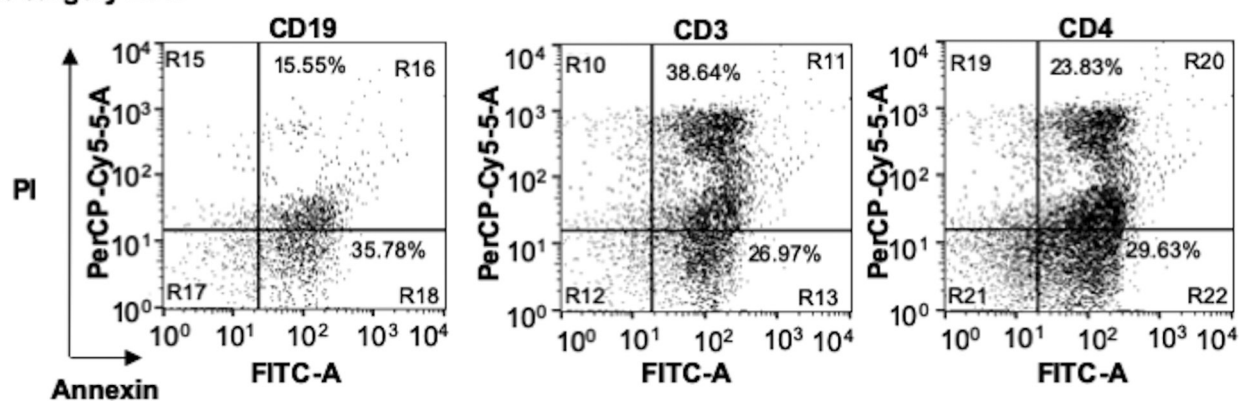

Supplement: Supplementary file 1 [file downloadSupplementary]
